# Supplementary material for: Autotrophic Acetate Production under Hydrogenophilic and Bioelectrochemical Conditions with a Thermally Treated Mixed Culture
Source: MDPI journal article supplement (doi:10.3390/membranes12020126), 2022-01-21
Supplement: s1 [file s1]

Article

# Thermal treated mixed culture under hydrogenophilic and bio-electrochemical condition for acetate autotrophic production

Jacopo Ferretti, Lorenzo Cristiani, Marianna Villano, Marco Zeppilli\*

Department of Chemistry, Sapienza University of Rome, P.le Aldo Moro 5, 00185 Rome, Italy

\* Correspondence: marco.zeppilli@uniroma1.it

## Supplementary material

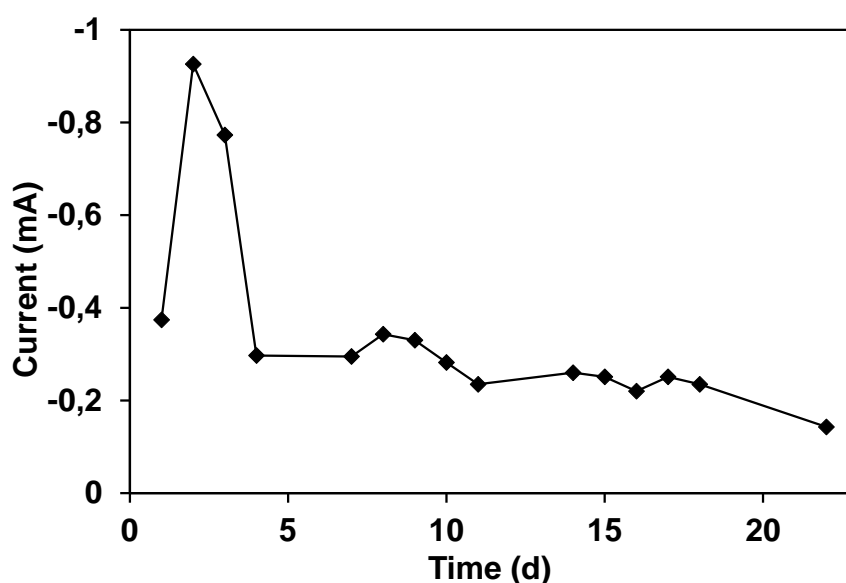

**Figure S1.** Time profile of the current generated in the bioelectrochemical batch cell.

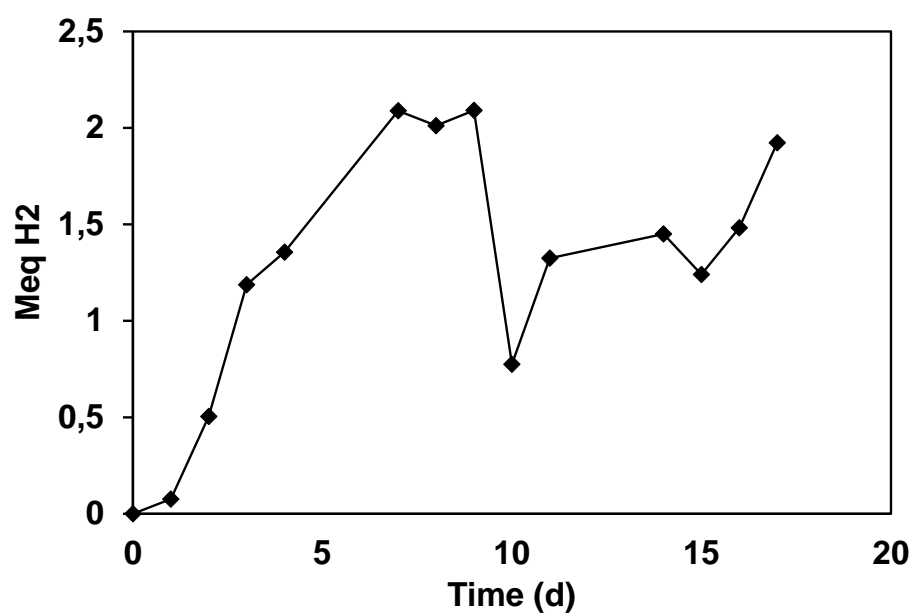

**Figure S2.** Time profile of the hydrogen in the cathodic chamber of the bioelectrochemical batch cell.

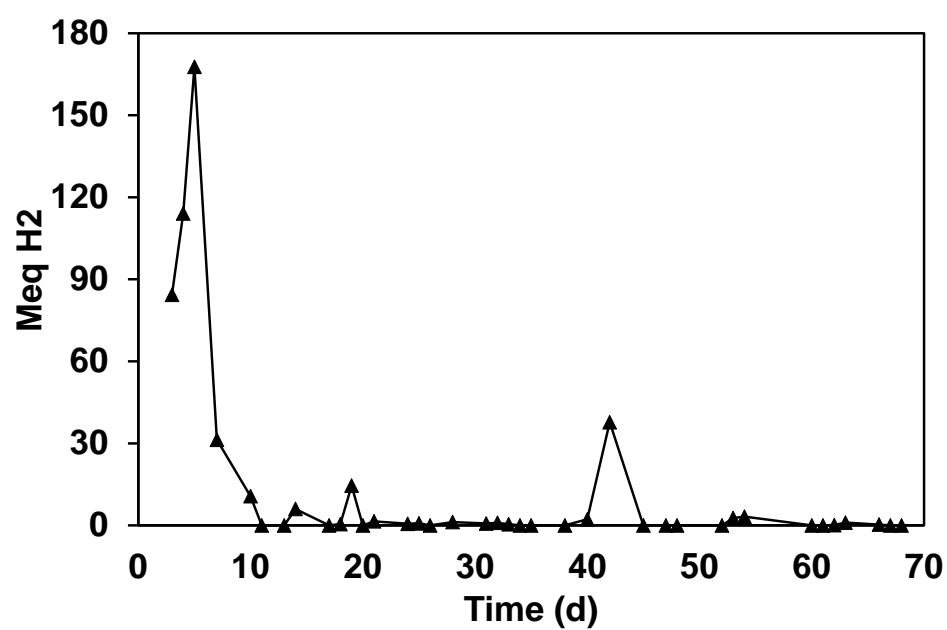

**Figure S3.** Time profile of the hydrogen produced in the continuous flow bioelectrochemical reactor.

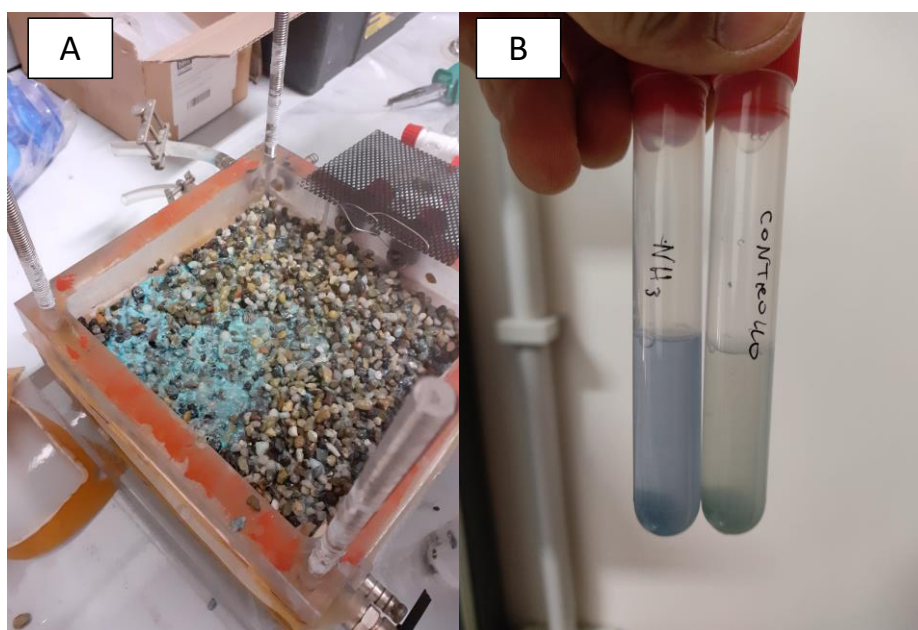

**Figure S4.** Insoluble precipitate on the FAD membrane (A), qualitative test for copper determination (B)

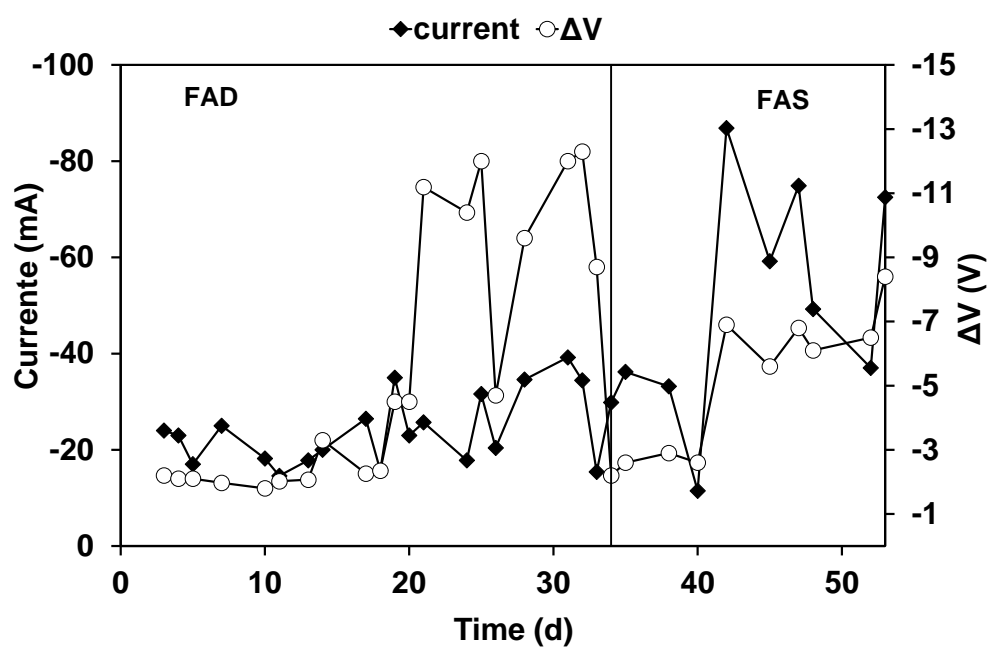

**Figure S5.** Time profile of current (mA) and cell voltage (V) in the continuous flow bioelectrochemical reactor.
